# Supplementary material
Source: PubMed Central journal article supplement (PMC3621788)
Supplement: NIHMS434715-supplement-01.pdf [file NIHMS434715-supplement-01.pdf]

## Supplementary figure

| Treatment Effectiveness Assessment (TEA)                                                                                                                                                                                                                                                                                                                                                                                                                                                                                                                                                                                                               |   |   |        |   |   |   |             |   |    |  |
|--------------------------------------------------------------------------------------------------------------------------------------------------------------------------------------------------------------------------------------------------------------------------------------------------------------------------------------------------------------------------------------------------------------------------------------------------------------------------------------------------------------------------------------------------------------------------------------------------------------------------------------------------------|---|---|--------|---|---|---|-------------|---|----|--|
| <p>The TEA asks you to express the extent of changes for the better from your involvement in the program to this point (or how things are if it's your first TEA or baseline) in four areas: substance use, health, lifestyle, and community. For each area, think about how things have become better and circle the results on the scale below: the more you have improved, the higher the number – from 1 (not better at all) to 10 (very much better). In each area write down the one or two changes most important to you in the Remarks section. Feel free to use the back of this page to add details, explain remarks, and make comments.</p> |   |   |        |   |   |   |             |   |    |  |
| <p><b>Substance use:</b> How much better are you with drug and alcohol use? Consider the frequency and amount of use, money spent on drugs, amount of drug craving, time spent being loaded, being sick, in trouble and in other drug-using activities, etc.</p>                                                                                                                                                                                                                                                                                                                                                                                       |   |   |        |   |   |   |             |   |    |  |
| None or not much                                                                                                                                                                                                                                                                                                                                                                                                                                                                                                                                                                                                                                       |   |   | Better |   |   |   | Much better |   |    |  |
| 1                                                                                                                                                                                                                                                                                                                                                                                                                                                                                                                                                                                                                                                      | 2 | 3 | 4      | 5 | 6 | 7 | 8           | 9 | 10 |  |
| Remarks:                                                                                                                                                                                                                                                                                                                                                                                                                                                                                                                                                                                                                                               |   |   |        |   |   |   |             |   |    |  |
| <p><b>Health:</b> Has your health improved? In what way and how much? Think about your physical and mental health: Are you eating and sleeping properly, exercising, taking care of health problems or dental problems, feeling better about yourself, etc?</p>                                                                                                                                                                                                                                                                                                                                                                                        |   |   |        |   |   |   |             |   |    |  |
| None or not much                                                                                                                                                                                                                                                                                                                                                                                                                                                                                                                                                                                                                                       |   |   | Better |   |   |   | Much better |   |    |  |
| 1                                                                                                                                                                                                                                                                                                                                                                                                                                                                                                                                                                                                                                                      | 2 | 3 | 4      | 5 | 6 | 7 | 8           | 9 | 10 |  |
| Remarks:                                                                                                                                                                                                                                                                                                                                                                                                                                                                                                                                                                                                                                               |   |   |        |   |   |   |             |   |    |  |
| <p><b>Lifestyle:</b> How much better are you in taking care of personal responsibilities? Think about your living conditions, family situation, employment, relationships: Are you paying your bills? Following through with your personal or professional commitments?</p>                                                                                                                                                                                                                                                                                                                                                                            |   |   |        |   |   |   |             |   |    |  |
| None or not much                                                                                                                                                                                                                                                                                                                                                                                                                                                                                                                                                                                                                                       |   |   | Better |   |   |   | Much better |   |    |  |
| 1                                                                                                                                                                                                                                                                                                                                                                                                                                                                                                                                                                                                                                                      | 2 | 3 | 4      | 5 | 6 | 7 | 8           | 9 | 10 |  |
| Remarks:                                                                                                                                                                                                                                                                                                                                                                                                                                                                                                                                                                                                                                               |   |   |        |   |   |   |             |   |    |  |
| <p><b>Community:</b> Are you a better member of the community? Think about things like obeying laws and meeting your responsibilities to society: Do your actions have positive or negative impacts on other people?</p>                                                                                                                                                                                                                                                                                                                                                                                                                               |   |   |        |   |   |   |             |   |    |  |
| No or not much                                                                                                                                                                                                                                                                                                                                                                                                                                                                                                                                                                                                                                         |   |   | Better |   |   |   | Much better |   |    |  |
| 1                                                                                                                                                                                                                                                                                                                                                                                                                                                                                                                                                                                                                                                      | 2 | 3 | 4      | 5 | 6 | 7 | 8           | 9 | 10 |  |
| Remarks:                                                                                                                                                                                                                                                                                                                                                                                                                                                                                                                                                                                                                                               |   |   |        |   |   |   |             |   |    |  |
| Name: _____ Date: _____ First TEA?: [ ]                                                                                                                                                                                                                                                                                                                                                                                                                                                                                                                                                                                                                |   |   |        |   |   |   |             |   |    |  |

Figure S1 Sample Treatment Effectiveness Assessment (TEA).

### Substance Abuse and Rehabilitation

Dovepress

### Publish your work in this journal

Substance Abuse and Rehabilitation is an international, peer-reviewed, open access journal publishing original research, case reports, editorials, reviews and commentaries on all areas of addiction and substance abuse and options for treatment and rehabilitation. The manuscript management system is completely online and includes a very quick and fair

peer-review system. Visit <http://www.dovepress.com/testimonials.php> to read real quotes from published authors.

Submit your manuscript here: <http://www.dovepress.com/substance-abuse-and-rehabilitation-journal>
